# Supplementary material
Source: HighWire-hosted journal article supplement (https://jnm.snmjournals.org/highwire/filestream/95556/field_highwire_adjunct_files/0/227322_Supplemental_Data.pdf)
Supplement: 227322_Supplemental_Data.pdf [file 227322_Supplemental_Data.pdf]

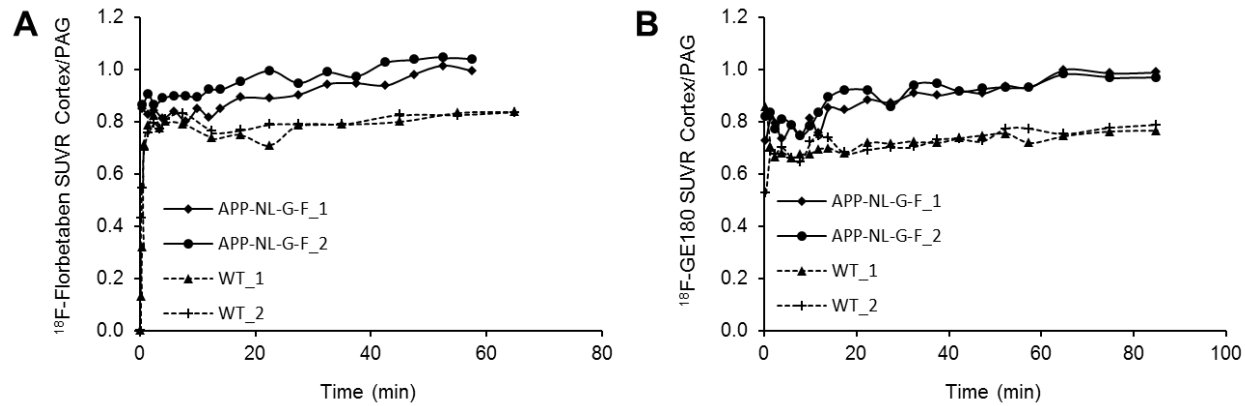

**Supplemental Figure 1:** Dynamic PET imaging of *App*<sup>NL-G-F</sup> mice with  $^{18}\text{F}$ -florbetaben (**A**; 0-60 min p.i.) and  $^{18}\text{F}$ -GE-180 (**B**; 0-90 min p.i.). Time-activity-curves show ratios of the cortical target region divided by the periaqueductal grey (PAG) for two *App*<sup>NL-G-F</sup> mice and two historic wild-type (WT) mice.

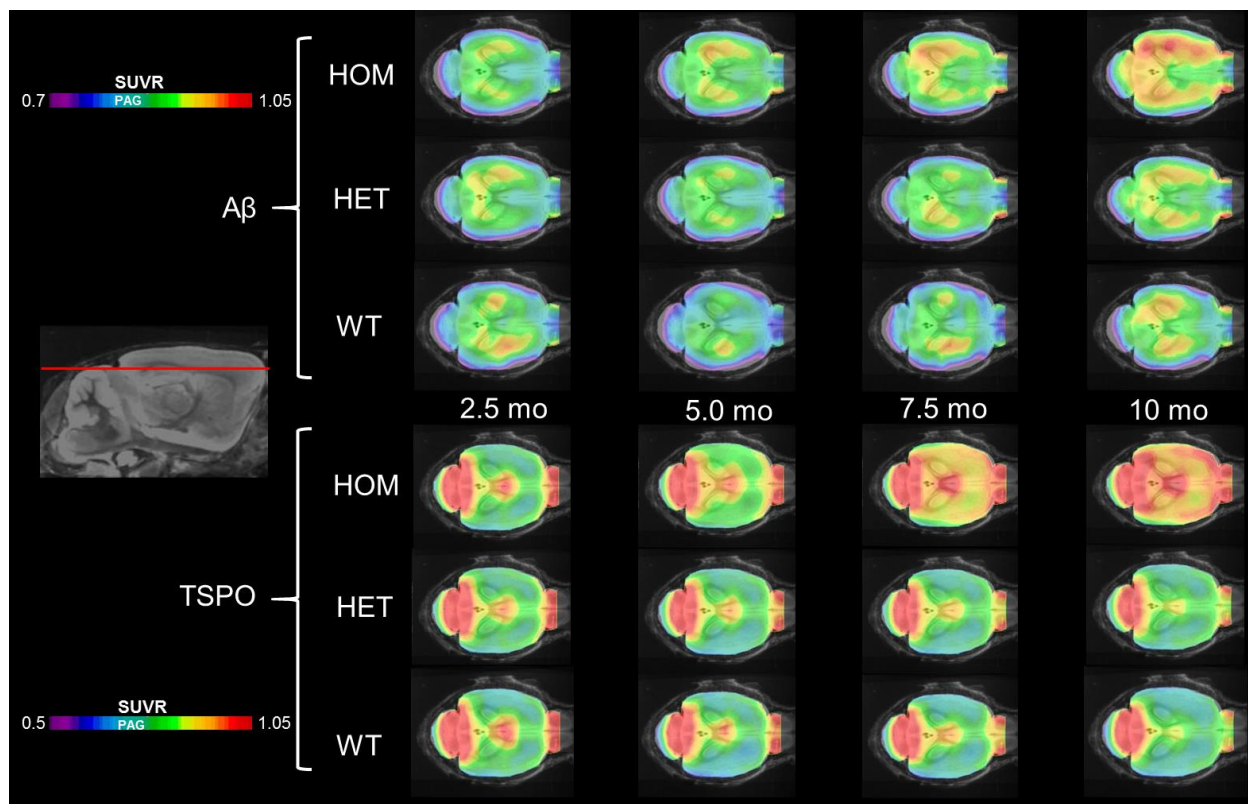

**Supplemental Figure 2.** Mean parametric SUVR images in axial planes of the A $\beta$  tracer  $^{18}\text{F}$ -FBB and the TSPO tracer  $^{18}\text{F}$ -GE-180 at different ages of HOM and HET *App<sup>NL-G-F</sup>* and pooled WT mice projected on MRI mouse atlas.

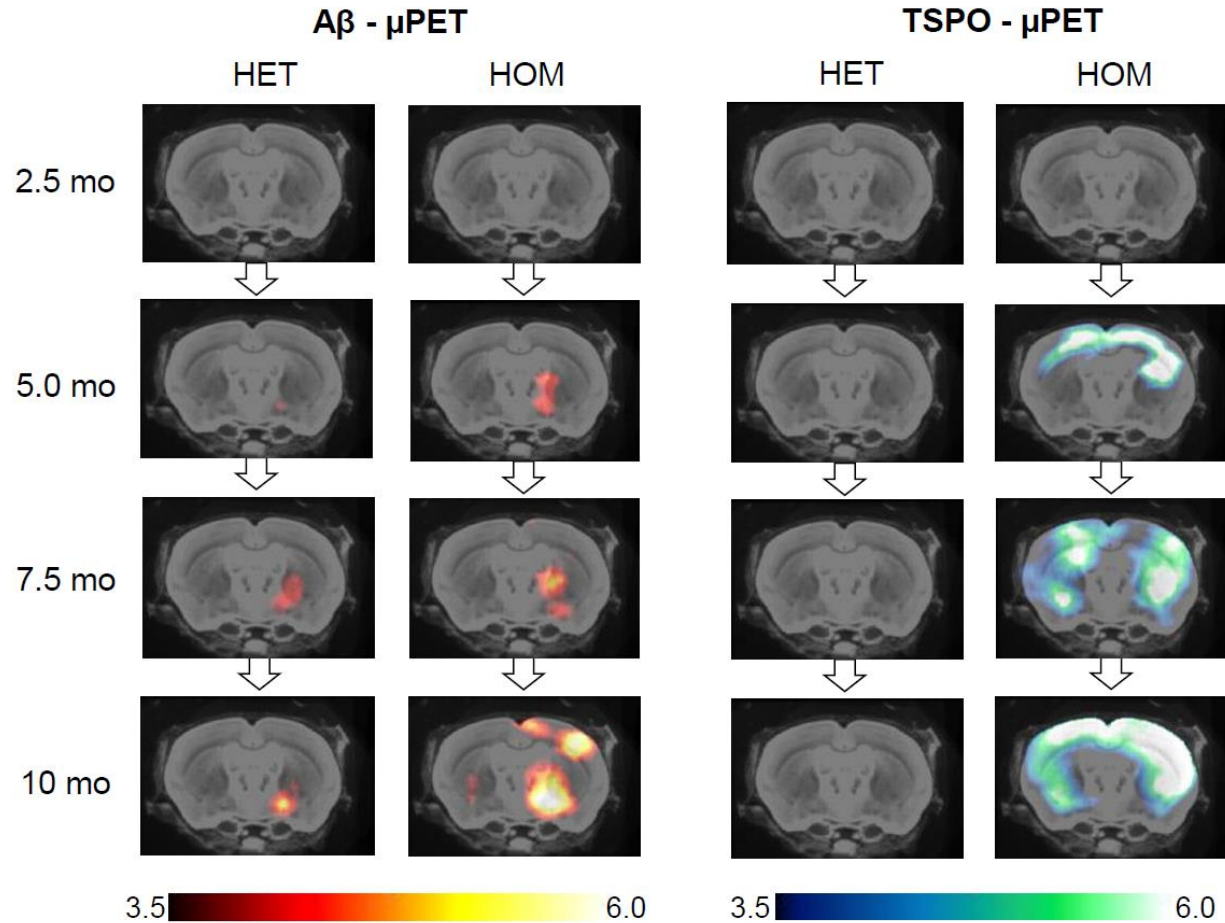

**Supplemental Figure 3:** Voxel-wise group comparisons of A $\beta$  and TSPO radiotracer uptake of homozygous (HOM) and heterozygous (HET) *App<sup>NL-G-F</sup>* mice versus age-matched WT mice at different ages. Two-sample t-test,  $p < 0.001$  uncorrected for multiple comparisons,  $k > 20$  voxels, projected upon an MRI mouse atlas (coronal slices).

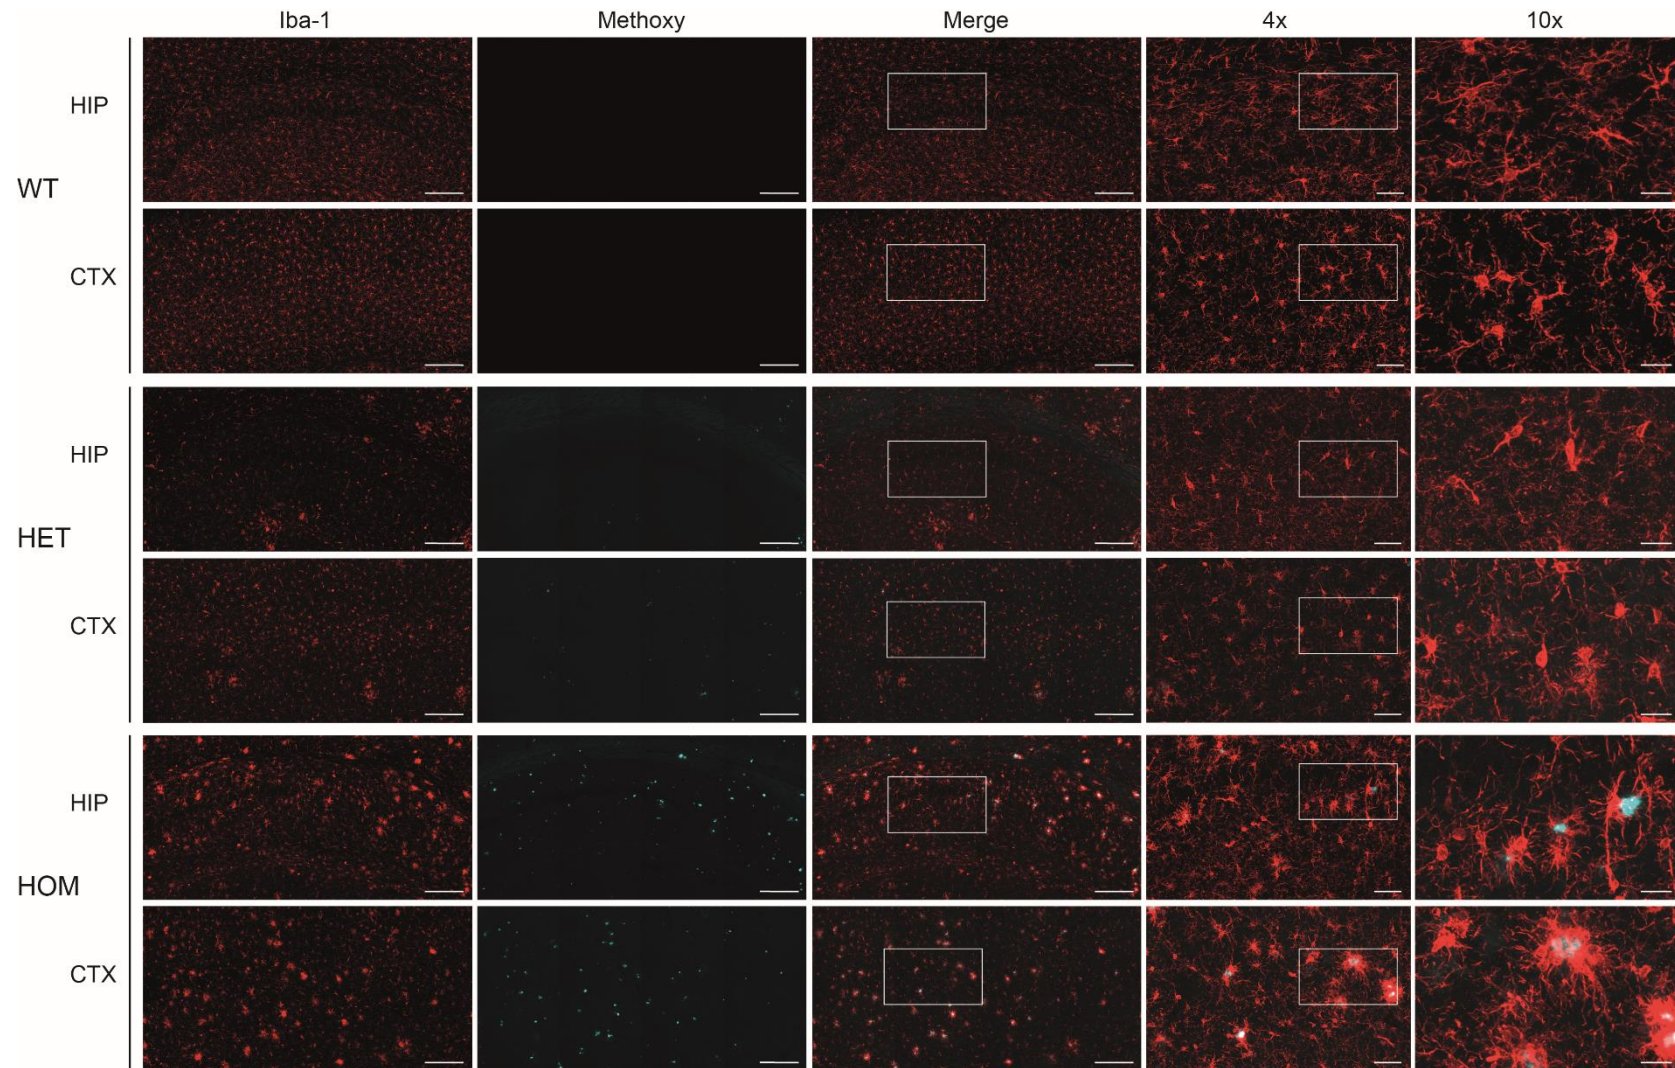

**Supplemental Figure 4.** Representative immunohistochemical (Iba-1) images of microglial activation and histochemical images showing and fibrillar A $\beta$  (Methoxy-X04), as well as merged images in cortical (CTX) and hippocampal (HIP) target regions for wild-type (WT) and heterozygous (HET) and homozygous (HOM) *App*<sup>NL-G-F</sup> mice. Scale bars represent 200  $\mu$ m (columns 1-3), 50  $\mu$ m (column 4) and 20  $\mu$ m (column 5).

**Supplemental Table 1:** Overview of multimodal terminal readouts

| Group<br>(Age=10mo)                            | Biochemistry              |                           |                          | Histochemistry         |                         |                       |                          | Behavior                   |
|------------------------------------------------|---------------------------|---------------------------|--------------------------|------------------------|-------------------------|-----------------------|--------------------------|----------------------------|
|                                                | A $\beta$ 40 ( $\mu$ g/g) | A $\beta$ 42 ( $\mu$ g/g) | sTrem2 (ng/g)            | Methoxy-X04<br>CTX (%) | Methoxy-X04<br>HIP (%)  | Iba1<br>CTX (%)       | Iba1<br>HIP (%)          | Latency to platform<br>(s) |
| <i>App</i> <sup>NL-G-F</sup><br>(homozygous)   | 0.3 $\pm$ 0.1***<br>n=8   | 96.9 $\pm$ 23.7***<br>n=8 | 39.5 $\pm$ 4.7***<br>n=8 | 1.3 $\pm$ 0.3**<br>n=4 | 1.4 $\pm$ 0.1***<br>n=5 | 8.5 $\pm$ 2.2*<br>n=5 | 10.0 $\pm$ 2.0***<br>n=5 | 29.4 $\pm$ 16.8*<br>n=11   |
| <i>App</i> <sup>NL-G-F</sup><br>(heterozygous) | <0.1<br>n=14              | 17.6 $\pm$ 4.6<br>n=14    | 11.7 $\pm$ 2.3<br>n=14   | 0.4 $\pm$ 0.3<br>n=5   | 0.1 $\pm$ 0.1<br>n=5    | 5.1 $\pm$ 1.3<br>n=5  | 3.3 $\pm$ 1.1<br>n=5     | 20.1 $\pm$ 11.7<br>n=14    |
| C57BL/6<br>(wild-type)                         | <0.1<br>n=4               | 0.3 $\pm$ 0.2<br>n=3      | 9.5 $\pm$ 1.7<br>n=4     | not detected           | not detected            | 4.3 $\pm$ 0.9<br>n=4  | 2.4 $\pm$ 0.8<br>n=4     | 14.3 $\pm$ 4.7<br>n=3      |

A $\beta$  and sTrem2 levels are given as ng per g of wet brain tissue. P-values for two-sided t-test in the comparison of homozygous *App*<sup>NL-G-F</sup> versus wild-type are given by: \*p<0.05; \*\*p<0.01; \*\*\*p<0.001; two-tails. Methoxy-X04 staining of homozygous *App*<sup>NL-G-F</sup> was tested against heterozygous *App*<sup>NL-G-F</sup> due to no detectable A $\beta$  plaques in wild-type. Histology quantification: 3-dimensional 16-bit data stacks of 8192x4096x32 pixels of confocal microscope images were acquired for the whole cortex as well as hippocampus at a lateral resolution of 0.2  $\mu$ m/pixel and an axial resolution of 1.0  $\mu$ m/pixel. To quantify Iba1-positive microglia burden as well as plaque-load we used autothresholding in ImageJ. For staining of fibrillar plaques we acquired 3-dimensional 16-bit data stacks of 2048x2048x120 pixels from five different positions in the frontal cortex as well as hippocampus at a lateral resolution of 0.17  $\mu$ m/pixel and an axial resolution of 0.4  $\mu$ m/pixel. For plaque quantitation, we utilized custom-written Matlab software (MathWorks, Natick, USA).

**Supplemental Table 2:** Comparison between mouse models

| Mouse model                  | Onset of congophilic Amyloidosis (months) | Age range of PET imaging (months) | Reference tissue | Amyloid $\mu$ PET (Cortical Increase) | TSPO $\mu$ PET (Cortical Increase) | Correlation sTrem2 - Amyloid- $\mu$ PET (terminal) | Correlation sTrem2 - TSPO- $\mu$ PET (terminal) | Correlation Water maze - Amyloid- $\mu$ PET (terminal) | Correlation Water maze - TSPO- $\mu$ PET (terminal) |
|------------------------------|-------------------------------------------|-----------------------------------|------------------|---------------------------------------|------------------------------------|----------------------------------------------------|-------------------------------------------------|--------------------------------------------------------|-----------------------------------------------------|
| <i>App</i> <sup>NL-G-F</sup> | 2.0                                       | 2.5-10.0                          | PAG              | 9.1%                                  | 19.8%                              | -                                                  | ++ (pos.)                                       | -                                                      | + (pos.)                                            |
| PS2APP (16)                  | 5.0                                       | 5.0-16.0                          | WM               | 19.8%                                 | 20.2%                              | +++ (pos.)                                         | +++ (pos.)                                      | -                                                      | ++ (neg.)                                           |
| APP-SL70 (26)                | 5.0                                       | 5.5-12.5 (average)                | WM               | 18.3%                                 | 17.6%                              | n.a.                                               | n.a.                                            | n.a.                                                   | n.a.                                                |

Overview of findings in homozygous *App*<sup>NL-G-F</sup> mice compared to other AD model mouse strains investigated with comparable  $\mu$ PET modalities. For comparing the correlations, we indicate significant  $R/r_s$  by + (0.2-0.5), ++ (0.5-0.8), +++ (0.8-1.0). n.a. = not assessed
